# Supplementary material for: The Interleukin-6 inflammation pathway from cholesterol to aging – Role of statins, bisphosphonates and plant polyphenols in aging and age-related diseases
Source: Springer Nature journal article supplement (doi:10.1186/1742-4933-4-1), 2007-03-20

**Acetate–mevalonate pathway**  
(Operates in humans)

**Non-mevalonate pathway**  
(Operates in some human pathogens/not in humans)

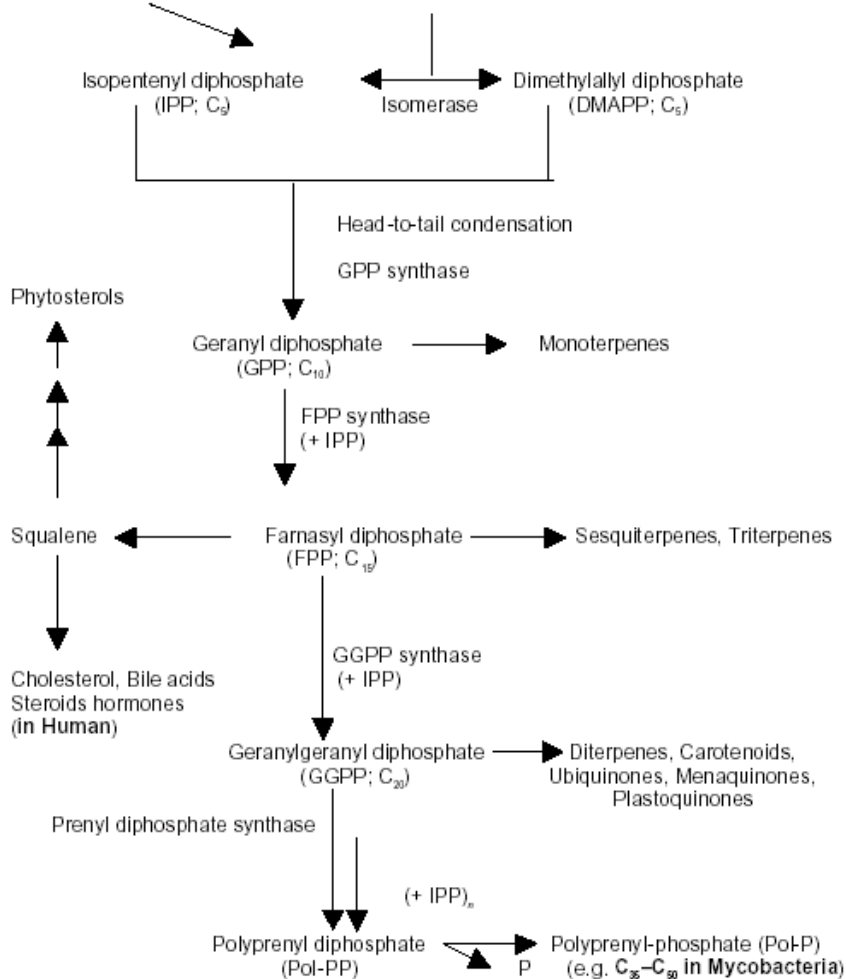

Supplement: 12979_2007_36_MOESM2_ESM.pdf [file 12979_2007_36_MOESM2_ESM.pdf]
